# Supplementary material for: Dual chirality control of palladium(ii) complexes bearing tropos biphenyl diamine ligands
Source: Royal Society of Chemistry journal article supplement (doi:10.1039/b510910h), 2005-01-01
Supplement: b510910h.pdf [file b510910h.pdf]

## Supporting Information

### Dual Chirality Control of Palladium(II) Complexes Bearing *Tropos* Biphenyl Diamine Ligands

Kohsuke Aikawa and Koichi Mikami\*

[\*] Prof. Dr. K. Mikami, Dr. K. Aikawa  
Department of Applied Chemistry  
Graduate School of Science and Engineering  
Tokyo institute of Technology  
O-okayama, Meguro-ku, Tokyo 152-8552 (Japan)  
Fax: Int. code (+81)3-5734-2776  
E-mail: [kmikami@o.cc.titech.ac.jp](mailto:kmikami@o.cc.titech.ac.jp)

#### General:

$^1\text{H}$  NMR,  $^{13}\text{C}$  NMR and  $^{31}\text{P}$  NMR spectra were measured on Varian GEMINI 300 (300 MHz) and Varian GEMINI 400 (400 MHz) spectrometers. Chemical shifts of  $^1\text{H}$  NMR were expressed in parts per million downfield from tetramethylsilane as an internal standard ( $\delta = 0$ ) in  $\text{CDCl}_3$ . Chemical shifts of  $^{13}\text{C}$  NMR were expressed in parts per million downfield from  $\text{CDCl}_3$  as an internal standard ( $\delta = 77.1$ ) in  $\text{CDCl}_3$ . Chemical shifts of  $^{31}\text{P}$  NMR were expressed in parts per million downfield from 85%  $\text{H}_3\text{PO}_4$  as an external standard ( $\delta = 0$ ) in  $\text{CDCl}_3$ . Optical rotations were measured on a JASCO DIP-370. Analytical thin layer chromatography (TLC) were performed on a glass plates (Merck Kieselgal 60 F<sub>254</sub>, layer thickness 0.25 and 0.2 mm). Column chromatography was performed on KANTO Silica Gel 60N (spherical, neutral). All experiments were carried out under argon atmosphere otherwise noted.

#### 2,2'-Diaminobiphenyl (DABP)

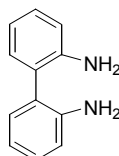

A slurry of 10% palladium on carbon (90 mg) was stirred in methanol (15 ml) while bubbling argon through the mixture. A solution of sodium borohydride (181.6 mg, 4.8 mmol) in water (5.0 ml) was added, and purging continued. Over the next 10 min, 2,2'-dinitro-1,1'-biphenyl (195.4 mg, 0.8 mmol) in methanol (15 ml) was added. The mixture was stirred at room temperature for 1 h, filtered with celite and taken to

dryness by evaporation. The residue was extracted with dichloromethane and ether. The organic layer was dried over  $\text{MgSO}_4$ . The  $\text{MgSO}_4$  was filtered off on celite, and then the filtrate was evaporated under reduced pressure. Without further purification, 2,2'-diamino-1,1'-biphenyl (DABP) was obtained in 94% yield.

$^1\text{H}$  NMR (300 MHz,  $\text{CDCl}_3$ )  $\delta$  3.71 (br s, 4H,  $\text{NH}_2$ ), 6.76 (dd,  $J = 7.8, 1.2$  Hz, 2H), 6.82 (ddd,  $J = 7.8, 7.4, 1.5$  Hz, 2H), 7.12 (dd,  $J = 7.5, 1.5$  Hz, 2H), 7.16 (ddd,  $J = 7.5, 7.4, 1.2$  Hz, 2H).

$^{13}\text{C}$  NMR (75 MHz,  $\text{CDCl}_3$ )  $\delta$  115.2, 118.5, 124.3, 128.5, 130.8, 143.9.

### *N,N'*-Dibenzyl-2,2'-diamino- 1,1'-biphenyl (**1a**)

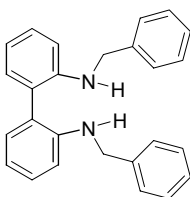

To a solution of 2,2'-diamino-1,1'-biphenyl (184.2 mg, 1.0 mmol) in toluene (5.0 ml) was added benzaldehyde (254  $\mu\text{l}$ , 2.5 mmol) under argon atmosphere. The mixture was refluxed (about 140  $^\circ\text{C}$ ) with a Dean-Stark for 24 h. After evaporation under reduced pressure, the diimine product was obtained through quantitative reaction (confirmed by  $^1\text{H}$  NMR analysis in  $\text{CDCl}_3$ ). To a mixture of the diimine and  $\text{NaBH}_4$  (756.6 mg 20 mmol) in toluene (10 ml) was added MeOH (10 ml) at -78  $^\circ\text{C}$  under argon atmosphere. The mixture was stirred at room temperature for 2 h. The reaction mixture was poured into 1*N* HCl and extracted with dichloromethane. The organic layer was washed with sat.  $\text{NaHCO}_3$ , brine and then dried over  $\text{MgSO}_4$ . The  $\text{MgSO}_4$  was filtered off on celite, and then the filtrate was evaporated under reduced pressure. The residue was purified by silica-gel chromatography (hexane/ethyl acetate = 5/1) to give the product (yield 82%).

$^1\text{H}$  NMR (300 MHz,  $\text{CDCl}_3$ )  $\delta$  4.33 (br, 2H), 4.37 (br s, 2H), 4.38 (br s, 2H), 6.70 (dd,  $J = 8.4, 0.9$  Hz, 2H), 6.82 (td,  $J = 7.5, 0.9$  Hz, 2H), 7.17 (dd,  $J = 7.4, 1.5$  Hz, 2H), 7.21-7.32 (m, 12H).

$^{13}\text{C}$  NMR (75 MHz,  $\text{CDCl}_3$ )  $\delta$  47.8, 110.8, 117.4, 123.9, 126.9, 128.5, 129.1, 131.0, 139.5, 145.6.

Anal. Calcd for  $\text{C}_{26}\text{H}_{24}\text{N}_2$ : C, 85.68; H, 6.64; N, 7.69%. Found: C, 85.67; H, 6.83; N, 7.56%.

### *N,N'*-Bis(2,4,6-trimethylbenzyl)-2,2'-diamino-1,1'-biphenyl (**1b**)

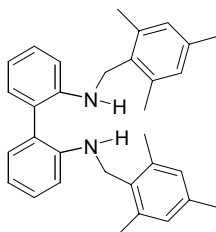

The titled compound was prepared from DABP according to the procedure as described for *N,N'*-dibenzyl-2,2'-diamino- 1,1'-biphenyl (**1a**) (yield 86%)

$^1\text{H}$  NMR (300 MHz,  $\text{CDCl}_3$ )  $\delta$  2.21 (s, 12H), 2.24 (s, 6H), 3.41 (br s, 2H), 4.06 (dd,  $J = 11.4, 2.7$  Hz, 2H),

4.55 (dd,  $J = 11.4, 3.9$  Hz, 2H), 6.71 (td,  $J = 7.5, 0.9$  Hz, 2H), 6.80 (s, 4H), 6.81 (d,  $J = 7.2$  Hz, 2H), 7.01 (dd,  $J = 7.2, 1.5$  Hz, 2H), 7.21-7.27 (m, 2H).

$^{13}\text{C}$  NMR (75 MHz,  $\text{CDCl}_3$ )  $\delta$  19.3, 20.9, 42.9, 110.9, 117.1, 123.8, 128.9, 129.0, 130.7, 131.9, 137.1, 137.4, 146.5.

Anal. Calcd for  $\text{C}_{32}\text{H}_{36}\text{N}_2 \cdot 2\text{H}_2\text{O}$ : C, 79.30; H, 8.32; N, 5.78%. Found: C, 78.16; H, 8.04; N, 5.20%.

***N,N'*-Bis(1-naphthyl)-2,2'-diamino-1,1'-biphenyl (1c)**

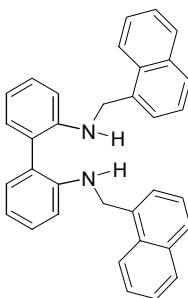

The titled compound was prepared from DABP according to the procedure as described for *N,N'*-dibenzyl-2,2'-diamino-1,1'-biphenyl (**1a**) without purification by silica-gel chromatography (yield 74%). The compound **5c** was insoluble in all solvents.

Anal. Calcd for  $\text{C}_{34}\text{H}_{28}\text{N}_2 \cdot \text{H}_2\text{O}$ : C, 84.61; H, 6.27; N, 5.80%. Found: C, 86.79; H, 6.31; N, 5.78%.

***N,N'*-Bis(2-naphthyl)-2,2'-diamino-1,1'-biphenyl (1d)**

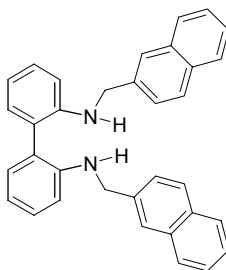

The titled compound was prepared from DABP according to the procedure as described for *N,N'*-dibenzyl-2,2'-diamino-1,1'-biphenyl (**1a**) (yield 81%).

$^1\text{H}$  NMR (300 MHz,  $\text{CDCl}_3$ )  $\delta$  4.43 (br, 2H), 4.53 (br s, 4H), 6.73 (dd,  $J = 8.4, 0.9$  Hz, 2H), 6.81 (td,  $J = 7.2, 0.9$  Hz, 2H), 7.17-7.22 (m, 4H), 7.39-7.44 (m, 6H), 7.66-7.80 (m, 8H).

$^{13}\text{C}$  NMR (75 MHz,  $\text{CDCl}_3$ )  $\delta$  48.1, 111.0, 117.5, 124.0, 125.2, 125.4, 125.5, 126.0, 127.6, 127.7, 128.3, 129.1, 131.0, 132.6, 133.4, 137.0, 145.7.

Anal. Calcd for  $\text{C}_{34}\text{H}_{28}\text{N}_2$ : C, 87.90; H, 6.07; N, 6.03%. Found: C, 86.58; H, 6.28; N, 5.87%.

***N*<sub>2</sub>PdCl<sub>2</sub> complex (2a)**

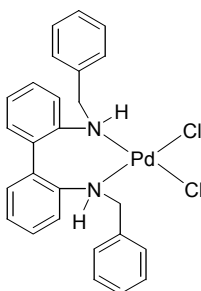

A solution of  $\text{PdCl}_2(\text{CH}_3\text{CN})_2$  (77.8 mg, 0.3 mmol) and *N,N'*-dibenzyl-2,2'-diamino-1,1'-biphenyl (**5a**) (109.3 mg, 0.3 mmol) in dichloromethane (10 ml) was stirred for 12 h at room temperature under argon atmosphere, and then evaporated. The complex was dissolved in a minimum amount of dichloromethane and precipitated by addition of hexane, washed with hexane, and then dried *in vacuo* (yield 97%). Recrystallization from dichloromethane-hexane gave single crystals, which allowed the 3D structure of the complex to be clarified by X-ray crystallographic analysis (*vide infra*).

$^1\text{H}$  NMR (300 MHz,  $\text{CDCl}_3$ )  $\delta$  3.61 (dd,  $J = 13.7, 10.8$  Hz, 2H, CHN), 4.58 (dd,  $J = 13.7, 2.7$  Hz, 2H, CHN), 5.53 (br, 2H, NH), 6.74 (d,  $J = 7.8$  Hz, 2H), 6.86-6.89 (m, 4H), 7.11-7.23 (m, 8H), 7.32 (dd,  $J = 7.8, 1.5$  Hz, 2H), 7.48 (td,  $J = 7.8, 1.5$  Hz, 2H).

$^{13}\text{C}$  NMR (75 MHz,  $\text{CDCl}_3$ )  $\delta$  55.3, 124.4, 128.9, 129.2, 130.1, 131.8, 132.6, 133.7, 139.1.

Anal. Calcd for  $\text{C}_{26}\text{H}_{24}\text{Cl}_2\text{N}_2\text{Pd}$ : C, 57.64; H, 4.46; N, 5.17%. Found: C, 57.51; H, 4.42; N, 5.00%.

#### $\text{N}_2\text{PdCl}_2$ complex (**2b**)

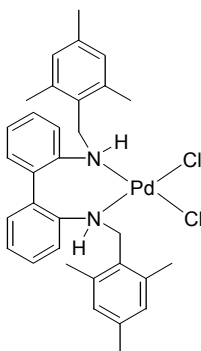

The titled compound was prepared from *N,N'*-bis(2,4,6-trimethylbenzyl)-2,2'-diamino-1,1'-biphenyl (**1b**) according to the procedure as described for **2a** (yield 81%).

$^1\text{H}$  NMR (300 MHz,  $\text{CDCl}_3$ )  $\delta$  2.19 (s, 6H), 2.45 (s, 12H), 3.47 (dd,  $J = 13.5, 1.2$  Hz, 2H, CHN), 4.04 (dd,  $J = 13.5, 8.4$  Hz, 2H, CHN), 5.22 (br, 2H, NH), 6.79 (s, 4H), 7.25 (d,  $J = 7.5$  Hz, 2H), 7.41 (td,  $J = 7.5, 1.5$  Hz, 2H), 7.47 (dd,  $J = 7.5, 1.5$  Hz, 2H), 7.55 (t,  $J = 7.5$  Hz, 2H).

$^1\text{H}$  NMR (300 MHz,  $\text{CD}_2\text{Cl}_2$ )  $\delta$  2.22 (s, 6H), 2.48 (s, 12H), 3.45 (dd,  $J = 13.5, 1.2$  Hz, 2H, CHN), 3.97 (dd,  $J = 13.5, 8.4$  Hz, 2H, CHN), 5.18 (br, 2H, NH), 6.83 (s, 4H), 7.23 (d,  $J = 7.5$  Hz, 2H), 7.45 (td,  $J = 7.5, 1.5$  Hz, 2H), 7.51 (dd,  $J = 7.5, 1.5$  Hz, 2H), 7.57 (td,  $J = 7.5, 0.9$  Hz, 2H).

$^{13}\text{C}$  NMR (75 MHz,  $\text{CD}_2\text{Cl}_2$ )  $\delta$  20.5, 20.8, 53.4, 122.0, 128.0, 129.0, 129.6, 130.4, 132.4, 133.4, 138.0, 139.0, 143.3.

Anal. Calcd for  $C_{32}H_{36}Cl_2N_2Pd \cdot 2H_2O$ : C, 58.06; H, 6.09; N, 4.23%. Found: C, 58.50; H, 5.65; N, 4.18%.

### $N_2PdCl_2$ complex (2c)

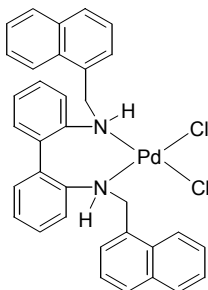

The titled compound was prepared from *N,N*-bis(1-naphthyl)-2,2'-diamino-1,1'-biphenyl (**1c**) according to the procedure as described for **2a** (yield 90%). Recrystallization from dichloromethane -hexane gave single crystals, which allowed the 3D structure of the complex to be clarified by X-ray crystallographic analysis (*vide infra*).

$^1H$ NMR (300 MHz,  $CD_2Cl_2$ )  $\delta$  4.00 (dd,  $J = 13.8, 11.1$  Hz, 2H, CHN), 5.22 (dd,  $J = 13.8, 2.7$  Hz, 2H, CHN), 6.00 (br, 2H, NH), 6.48 (d,  $J = 7.8$  Hz, 2H), 6.88 (d,  $J = 6.3$  Hz, 2H), 7.03-7.08 (m, 2H), 7.17 (d,  $J = 7.7$  Hz, 2H), 7.46-7.49 (m, 4H), 7.54 (d,  $J = 7.8$  Hz, 2H), 7.67 (d,  $J = 7.8$  Hz, 2H), 7.73 (d,  $J = 8.1$  Hz, 2H), 7.85 (d,  $J = 7.8$  Hz, 2H), 8.46 (d,  $J = 8.4$  Hz, 2H).

$^{13}C$ NMR (75 MHz,  $CD_2Cl_2$ )  $\delta$  53.3, 123.2, 124.0, 124.9, 126.6, 127.7, 128.6, 129.3, 129.4, 130.0, 130.1, 131.4, 131.8, 133.3, 134.2, 139.3.

Anal. Calcd for  $C_{34}H_{28}Cl_2N_2Pd$ : C, 63.62; H, 4.40; N, 4.36%. Found: C, 63.25; H, 4.20; N, 4.22%.

### $N_2PdCl_2$ complex (2d)

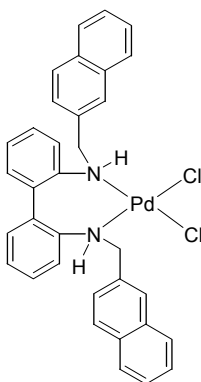

The titled compound was prepared from *N,N*-bis(2-naphthyl)-2,2'-diamino-1,1'-biphenyl (**1d**) according to the procedure as described for **2a** (yield 96%). Recrystallization from dichloromethane -hexane gave single crystals, but X-ray crystallographic analysis is not tried yet.

$^1H$ NMR (300 MHz,  $CDCl_3$ )  $\delta$  3.81 (dd,  $J = 13.8, 11.3$  Hz, 2H, CHN), 4.79 (dd,  $J = 13.8, 2.4$  Hz, 2H, CHN), 5.70 (br, 2H, NH), 6.78 (d,  $J = 8.1$  Hz, 2H), 6.99 (dd,  $J = 8.7, 1.5$  Hz, 2H), 7.18 (td,  $J = 7.8, 1.5$  Hz, 2H), 7.37-7.54 (m, 10H), 7.65 (d,  $J = 8.7$  Hz, 2H), 7.69-7.76 (m, 4H).

<sup>13</sup>C NMR (75 MHz, CD<sub>2</sub>Cl<sub>2</sub>) δ 55.5, 124.5, 126.1, 126.8, 126.9, 127.9, 128.1, 128.7, 128.9, 129.5, 130.2, 131.4, 132.0, 133.0, 133.3, 133.4, 139.2.

**(R)-N<sub>2</sub>Pd/(R)-DABNTf complex (R/R,R/R-3a)**

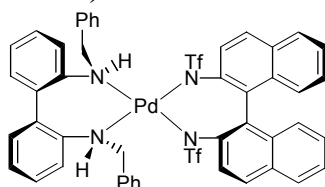

<sup>19</sup>F NMR (376 MHz, CDCl<sub>3</sub>) δ -76.1 (s, 6F). *cf.* (*R*)-DABNTf; δ -76.8 (s, 6F).

$$[\alpha]_{\text{D}}^{26} = +846.0 \text{ (c = 1.71 in CHCl}_3\text{)}. \text{ cf. (R)-DABNTf; } [\alpha]_{\text{D}}^{27} = +115.3 \text{ (c = 0.3 in CHCl}_3\text{)}$$

### DB-DABP-PdCl<sub>2</sub> complex

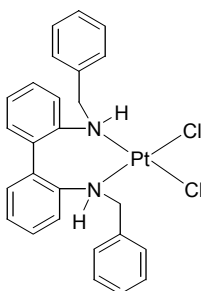

A solution of  $\text{PtCl}_2(\text{CH}_3\text{CN})_2$  (34.8 mg, 0.1 mmol) and diamine ligand **1a** (36.4 mg, 0.1 mmol) in dichloroethane (4.0 ml) was stirred for 24 h at 80 °C under argon atmosphere. The mixture was filtered off on celite, and then the filtrate was evaporated under reduced pressure. The residue was dissolved in a minimum amount of dichloromethane and precipitated by addition of ether, washed with ether, and then dried *in vacuo* (yield 65%).

# Supplementary Material (ESI) for Chemical Communications

# This journal is © The Royal Society of Chemistry 2005

$^1\text{H}$  NMR (300 MHz,  $\text{CDCl}_3$ )  $\delta$  3.60 (dd,  $J = 13.2, 11.1$  Hz, 2H, *CHN*), 4.63 (dd,  $J = 13.2, 2.4$  Hz, 2H, *CHN*), 6.11 (br, 2H, *NH*), 6.69 (d,  $J = 8.1$  Hz, 2H), 6.89 (dd,  $J = 7.5, 1.8$  Hz, 4H), 7.14-7.25 (m, 8H), 7.39 (dd,  $J = 7.5, 1.8$  Hz, 2H), 7.46 (td,  $J = 7.2, 0.9$  Hz, 2H).

$^{13}\text{C}$  NMR (75 MHz,  $\text{CDCl}_3$ )  $\delta$  57.6, 123.9, 128.8, 128.9, 129.0, 130.1, 131.5, 132.8, 133.7, 140.0.
